# Supplementary material for: Highly Parallel Genome-Wide Expression Analysis of Single Mammalian Cells
Source: PLOS journal article supplement (doi:10.1371/journal.pone.0030794), 2012-02-08
Supplement: S1 (10.1371/journal.pone.0030794.s001) [file journal.pone.0030794.s001]

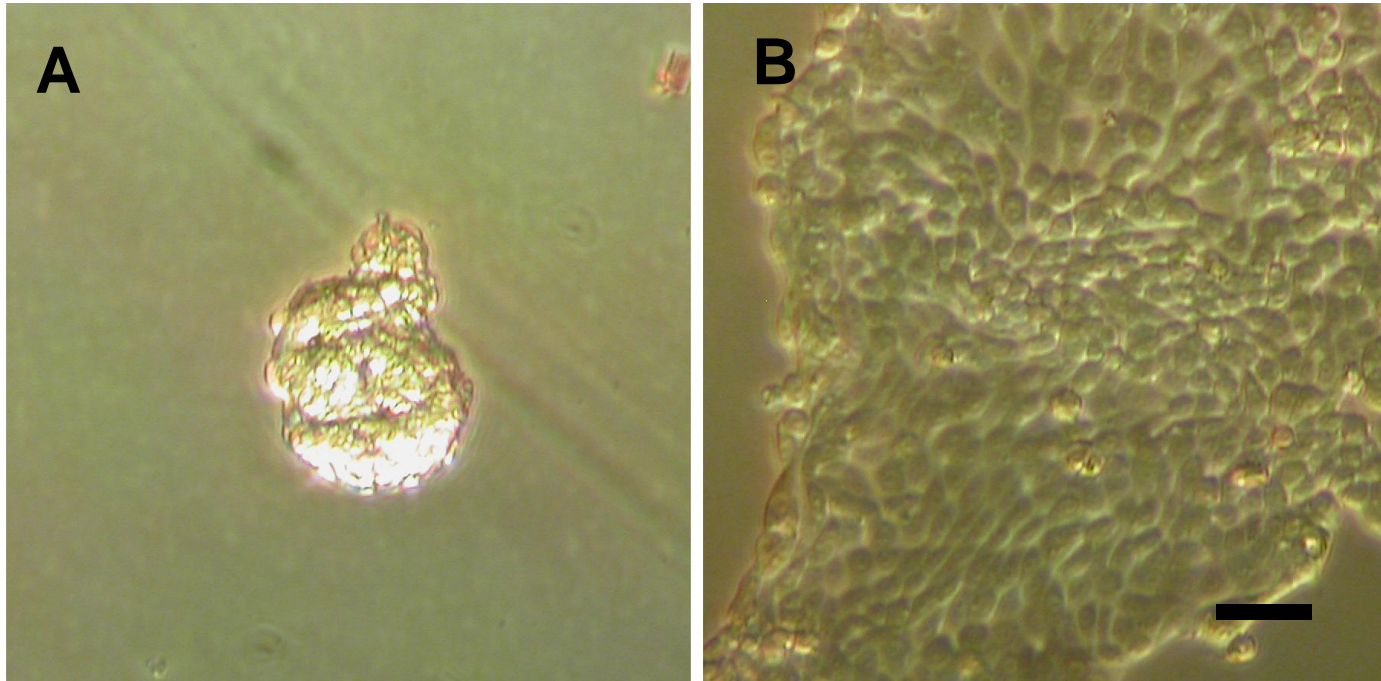

Figure S1. Ovarian cancer cells (RMG1) were cultured in stem cell media. (A) a spheroid in an ultra-low attachment plate, (B) a spheroid in a tissue-culture treated plate, after two days in a regular plate. Scale bar = 90  $\mu\text{m}$
